# Supplementary material for: Clinical Course and Outcomes of coronavirus disease 2019 (COVID-19) in Rheumatic Disease Patients on Immunosuppression: A case Cohort Study at a Single Center with a Significantly Diverse Population
Source: bioRxiv or medRxiv preprint supplement (doi:10.1101/2020.10.26.20219154), 2020-10-27
Supplement: Supplementary file [file media-1.pdf]

**Supplemental Table 1.** Disease categories and their associated ICD-10 codes used to identify patients with rheumatic disease.

| <b>Category</b>           | <b>Disease (ICD-10 code)</b>                                                                                                                                                                                                                                                                                                                                                                                                                                                                                                |
|---------------------------|-----------------------------------------------------------------------------------------------------------------------------------------------------------------------------------------------------------------------------------------------------------------------------------------------------------------------------------------------------------------------------------------------------------------------------------------------------------------------------------------------------------------------------|
| Inflammatory arthritis    | <ul style="list-style-type: none"> <li>• Rheumatoid arthritis (M05%, M06%)</li> <li>• Ankylosing spondylitis (M45%)</li> <li>• Psoriatic arthritis or arthropathic psoriasis (L40.5)</li> </ul>                                                                                                                                                                                                                                                                                                                             |
| Vasculitis                | <ul style="list-style-type: none"> <li>• Polyarteritis nodosa and related conditions (M30%)</li> <li>• Other necrotizing vasculopathies (M31%)</li> <li>• Unspecified arteritis (I77.6)</li> </ul>                                                                                                                                                                                                                                                                                                                          |
| Other autoimmune diseases | <ul style="list-style-type: none"> <li>• Sarcoidosis (D86%)</li> <li>• Systemic lupus erythematosus (M32%, L93%)</li> <li>• Dermatopolymyositis (M33%)</li> <li>• Systemic sclerosis (M34%)</li> <li>• Other systemic involvement of connective tissue (M35%)</li> <li>• Crohn's disease (K50%)</li> <li>• Ulcerative colitis (K51%)</li> <li>• Pulmonary eosinophilia, not elsewhere specified (J82%)</li> <li>• Other interstitial diseases (J84%)</li> <li>• Panuveitis, sympathetic uveitis (H44.11, H44.13)</li> </ul> |

Note: ICD-10 = international classification of disease 10<sup>th</sup> revision codes. The % sign indicates a wild character allowing capture of all instances of a given code.
