# Supplementary material for: Clinical Course and Outcomes of coronavirus disease 2019 (COVID-19) in Rheumatic Disease Patients on Immunosuppression: A case Cohort Study at a Single Center with a Significantly Diverse Population
Source: bioRxiv or medRxiv preprint supplement (doi:10.1101/2020.10.26.20219154), 2020-10-27
Supplement: Supplementary file [file media-2.pdf]

**Supplemental Table 2.** List of medications used to identify patients on immunosuppressive medications

| <b>Criteria</b>                                    | <b>Medication</b>                                                                                                                                                                                                                                                                                                          |
|----------------------------------------------------|----------------------------------------------------------------------------------------------------------------------------------------------------------------------------------------------------------------------------------------------------------------------------------------------------------------------------|
| Taking medication as prescribed for $\geq 1$ month | <ul style="list-style-type: none"><li>• Anakinra</li><li>• Azathioprine</li><li>• Baricitinib</li><li>• Cyclophosphamide</li><li>• Hydroxychloroquine</li><li>• Leflunomide</li><li>• Methylprednisolone</li><li>• Methotrexate</li><li>• Mycophenolate mofetil</li><li>• Prednisone</li><li>• Tofacitinib</li></ul>       |
| Has received last scheduled injection              | <ul style="list-style-type: none"><li>• Abatacept</li><li>• Adalimumab</li><li>• Belimumab</li><li>• Certolizumab</li><li>• Etanercept</li><li>• Golimumab</li><li>• Infliximab</li><li>• Ixekinumab</li><li>• Natalizumab</li><li>• Rituximab</li><li>• Secukinumab</li><li>• Tocilizumab</li><li>• Ustekinumab</li></ul> |
